# Supplementary material
Source: PubMed Central journal article supplement (PMC6439863)
Supplement: jamasurg-154-65-s001.pdf [file jamasurg-154-65-s001.pdf]

## Supplementary Online Content

Hood BR, Cowen ME, Zheng H, Hughes RE, Singal B, Hallstrom BR. Association of aspirin with prevention of venous thromboembolism in patients after total knee arthroplasty compared with other anticoagulants. *JAMA Surg*. Published online October 17, 2018.  
doi:10.1001/jamasurg.2018.3858

### **eMethods.**

**eTable 1.** Raw Baseline Data of Study Population

**eTable 2.** Adjusted Odds Ratio for the Primary Outcome VTE/Death and Secondary Outcome Bleeding Event: Excluding Patients With VTE History

### **eReferences**

This supplementary material has been provided by the authors to give readers additional information about their work.

### **eMethods**

For the analytical dataset 33,796 (81.36%) cases are complete without missing any value and 4,756 (11.45%) are missing only one data element resulting in 38,550 (92.81%) cases that are complete or only missing 1 value. The data point with the most missing values is creatinine with 7.2% missing, followed by assistive device usage at 4.2% missing.

The natural log transformation was applied to operation time and frequency of screening for VTE. Four variables, including age, BMI, pre-surgical hemoglobin and creatinine were centered at mean zero. Kruskal-Wallis Test is used to compare age, BMI, pre-surgical hemoglobin and creatinine and operation times between prophylaxis sub-groups (None, Anticoagulation Only, Aspirin Only, Both Anticoagulation and Aspirin). Chi-square test is used to test the association between categorical variables and prophylaxis sub-groups (None, Anticoagulation Only, Aspirin Only, Both Anticoagulation and Aspirin).

To minimize the loss of power and decrease bias due to exclusion of cases that were missing one or more covariates, missing covariates were imputed 10 times using multivariate sequential regression approach using SAS procedure PROC MI and PROC MIANALYZE.<sup>1,2</sup> To minimize the potential for bias by indication between patient groups and to enhance causal inference, we derived inverse probability of treatment weights (IPTW) using multinomial logistic regression to determine the probability of patients being in each of four potential prophylactic regimen categories.<sup>3-6</sup> The following explanatory variables were used to derive the probability of a given treatment: age, age<sup>2</sup>, BMI, BMI<sup>2</sup>, preoperative hemoglobin, preoperative creatinine, sex, ASA score, race, smoking status, insurance type, marital status, preoperative narcotic, steroid, or antiplatelet use, bleeding disorder, history of DVT or PE, use of assistive devices, Elixhauser comorbidities, foot pumps, tranexamic acid, general anesthesia, time period and VTE testing. Stabilized weights were calculated with consideration of marginal propensity score in each treatment group. To further account for overly influential cases (~1% of total cases), the stabilized weights were trimmed at 99<sup>th</sup> percentiles, with weights beyond 99<sup>th</sup> percentile replaced by the 99<sup>th</sup> percentile value.<sup>7-9</sup>

T-test was used to calculate the P values for inferiority.<sup>10,11</sup>

Table 1 in the manuscript is a shortened version for the manuscript. Appendix Table A includes the complete list of unadjusted data elements.

Appendix Table B reports the results of a sensitivity analysis performed by excluding patients with a prior history of VTE, rebuilding the propensity score model and recalculating the OR and P values. While the absolute values of the OR (95%) and p values change slightly when excluding the 2320 cases with a history of VTE, the significance conclusion remains the same. This sensitivity analysis suggests that the fundamental conclusions of the non-inferiority of aspirin compared with other anticoagulants are still established, with p for inferiority = 0.0177 for VTE/PE and p for inferiority = 0.0085 for bleeding, respectively.

1. SAS® 9.4, SAS Institute Inc., Cary, NC, USA.
2. Little RJA, Rubin DB. *Statistical Analysis with Missing Data*. 2nd Ed. New York: John Wiley & Sons. 409 pp.
3. Li F, Zaslavsky AM, Landrum MB. Propensity score weighting with multilevel data. *Stat Med*. 2013;32(19):3373-3387.
4. Xu S, Ross C, Raebel MA, Shetterly S, Blanchette C, Smith D. Use of stabilized inverse propensity scores as weights to directly estimate relative risk and its confidence intervals. *Value Health*. 2010;13(2):273-277.
5. Lee BK, Lessler J, Stuart EA. Weight trimming and propensity score weighting. *PLoS ONE*. 2011;6(3):e18174. doi:10.1371/journal.pone.0018174.  
<http://journals.plos.org/plosone/article?id=10.1371/journal.pone.0018174>
6. Lunceford JK, Davidian M. Stratification and weighting via the propensity score in estimation of causal treatment effects: a comparative study. *Stat Med*. 2004;23(19):2937-2960.
7. Brookhart MA, Wyss R, Layton JB, Stürmer T. Propensity score methods for confounding control in nonexperimental research. <http://circoutcomes.ahajournals.org/content/6/5/604>. DOI: 10.1161/CIRCOUTCOMES.113.000359
8. Austin PC, Mamdani MM, van Walraven C, Tu JV. A comparison of propensity score methods: A case-study estimating the effectiveness of post-AMI statin use. *Stat Med*. 2006;25:2084-2106.
9. Stürmer T, Wyss R, Glynn RJ, Brookhart MA. Propensity scores for confounder adjustment when assessing the effects of medical interventions using nonexperimental study designs. *J Int Med*. 2014;275(6):570-580.

10. Esteban Walker, Amy S. Nowacki, *Understanding Equivalence and Noninferiority Testing*. *J Gen Intern Med*. 2011 Feb; 26(2): 192–196. Published online 2010 Sep 21.
11. Willett K, Keene DJ, Mistry D, Nam J, Tutton E, Handley R, Morgan L, Roberts E, Briggs A, Lall R, Chesser TJ, Pallister I, Lamb SE; Ankle Injury Management (AIM) Trial Collaborators. *Close Contact Casting vs Surgery for Initial Treatment of Unstable Ankle Fractures in Older Adults: A Randomized Clinical Trial*. *JAMA*. 2016 Oct 11;316(14):1455-1463.

eTable 1

Raw Baseline Data of Study Population

| Variable                           |       | Population<br>N = 41537 | None<br>N = 668 |                  | Aspirin Only<br>N = 12831 |                   | Anticoagulant Only<br>N = 22620 |                    | Both<br>N = 5418 |                   | Tests                                        |
|------------------------------------|-------|-------------------------|-----------------|------------------|---------------------------|-------------------|---------------------------------|--------------------|------------------|-------------------|----------------------------------------------|
| <b>Continuous Variables</b>        | N     | Mean<br>(SD*)           | N               | Mean<br>(SD*)    | N                         | Mean<br>(SD*)     | N                               | Mean<br>(SD*)      | N                | Mean<br>(SD*)     | Kruskal-<br>Wallis Test <sup>†</sup>         |
| Age_at_Case                        | 41537 | 65.8 (9.8)              | 668             | 65.7 (10.2)      | 12831                     | 65.6 (9.8)        | 22620                           | 65.5 (9.8)         | 5418             | 67.4 (9.4)        | p<.0001                                      |
| BMI                                | 41369 | 33.1 (6.9)              | 664             | 32.6 (6.6)       | 12783                     | 32.7 (6.7)        | 22523                           | 33.4 (7.1)         | 5399             | 33.1 (6.8)        | p<.0001                                      |
| Pre-op creatinine                  | 37412 | 0.9 (0.4)               | 592             | 0.9 (0.5)        | 11824                     | 0.9 (0.4)         | 20166                           | 0.9 (0.4)          | 4830             | 0.9 (0.4)         | p<.0001                                      |
| Pre-op hemoglobin                  | 40631 | 13.7 (1.4)              | 641             | 13.5 (1.5)       | 12511                     | 13.7 (1.4)        | 22152                           | 13.6 (1.3)         | 5327             | 13.7 (1.4)        | p<.0001                                      |
| Operative time (15 min increments) | 41518 | 5.7 (2)                 | 667             | 6 (2.5)          | 12817                     | 5.4 (1.8)         | 22617                           | 5.9 (2.1)          | 5417             | 5.6 (1.7)         | p<.0001                                      |
| <b>Categorical Variables</b>       |       | n<br>(n/N %)            | Den<br>†        | Num‡             | Den†                      | Num‡              | Den†                            | Num‡               | Den<br>†         | Num‡              | Pearson<br>Chi-square<br>tests <sup>††</sup> |
| African-American                   |       | 3230<br>( 7.78% )       | 668             | 54<br>( 8.08% )  | 12831                     | 855<br>( 6.66% )  | 22620                           | 1840<br>( 8.13% )  | 5418             | 481<br>( 8.88% )  | p <.0001                                     |
| Gender (Male)                      |       | 14966<br>( 36.1% )      | 668             | 261<br>( 39.1% ) | 12822                     | 4882<br>( 38.1% ) | 22605                           | 7499<br>( 33.2% )  | 5418             | 2324<br>( 42.9% ) | p <.0001                                     |
| Marital status(Married)            |       | 27462<br>( 66.2% )      | 667             | 453<br>( 67.9% ) | 12795                     | 8658<br>( 67.7% ) | 22595                           | 14652<br>( 64.8% ) | 5415             | 3699<br>( 68.3% ) | p <.0001                                     |
| Smoking status                     |       |                         |                 |                  |                           |                   |                                 |                    |                  |                   | p <.0001                                     |
| <i>Never</i>                       |       | 20818<br>( 50.9% )      | 654             | 317<br>( 48.5% ) | 12626                     | 6458<br>( 51.1% ) | 22355                           | 11540<br>( 51.6% ) | 5300             | 2503<br>( 47.2% ) |                                              |
| <i>Former</i>                      |       | 16192<br>( 39.6% )      | 654             | 276<br>( 42.2% ) | 12626                     | 4990<br>( 39.5% ) | 22355                           | 8607<br>( 38.5% )  | 5300             | 2319<br>( 43.8% ) |                                              |
| <i>Current</i>                     |       | 3925<br>( 9.59% )       | 654             | 61<br>( 9.33% )  | 12626                     | 1178<br>( 9.33% ) | 22355                           | 2208<br>( 9.88% )  | 5300             | 478<br>( 9.02% )  |                                              |
| Time period                        |       |                         |                 |                  |                           |                   |                                 |                    |                  |                   | p <.0001                                     |
| <i>Apr. 1, 2013-Sep 30, 2013</i>   |       | 5226<br>( 12.6% )       | 667             | 108<br>( 16.2% ) | 12819                     | 676<br>( 5.27% )  | 22617                           | 3656<br>( 16.2% )  | 5418             | 786<br>( 14.5% )  |                                              |
| <i>Oct. 1, 2013-Mar 30, 2014</i>   |       | 7656<br>( 18.4% )       | 667             | 109<br>( 16.3% ) | 12819                     | 1447<br>( 11.3% ) | 22617                           | 5038<br>( 22.3% )  | 5418             | 1062<br>( 19.6% ) |                                              |

|                                  |  |                    |     |                  |       |                    |       |                    |      |                   |          |
|----------------------------------|--|--------------------|-----|------------------|-------|--------------------|-------|--------------------|------|-------------------|----------|
| <i>Apr. 1, 2014-Sep 30, 2014</i> |  | 8429<br>( 20.3% )  | 667 | 107<br>( 16.0% ) | 12819 | 2318<br>( 18.1% )  | 22617 | 4878<br>( 21.6% )  | 5418 | 1126<br>( 20.8% ) |          |
| <i>Oct. 1, 2014-Mar 30, 2015</i> |  | 9070<br>( 21.8% )  | 667 | 154<br>( 23.1% ) | 12819 | 3094<br>( 24.1% )  | 22617 | 4613<br>( 20.4% )  | 5418 | 1209<br>( 22.3% ) |          |
| <i>Apr. 1, 2015-Oct 31, 2015</i> |  | 11140<br>( 26.8% ) | 667 | 189<br>( 28.3% ) | 12819 | 5284<br>( 41.2% )  | 22617 | 4432<br>( 19.6% )  | 5418 | 1235<br>( 22.8% ) |          |
| Surgical approach                |  |                    |     |                  |       |                    |       |                    |      |                   | p <.0001 |
| <i>Medial parapatellar</i>       |  | 34185<br>( 82.3% ) | 668 | 542<br>( 81.1% ) | 12831 | 10424<br>( 81.2% ) | 22620 | 19158<br>( 84.7% ) | 5418 | 4061<br>( 75.0% ) |          |
| <i>Lateral parapatellar</i>      |  | 181<br>( .44% )    | 668 | < 10             | 12831 | 96<br>( .748% )    | 22620 | 52<br>( .230% )    | 5418 | 27<br>( .498% )   |          |
| <i>Midvastus</i>                 |  | 5814<br>( 14.0% )  | 668 | 90<br>( 13.5% )  | 12831 | 1774<br>( 13.8% )  | 22620 | 2800<br>( 12.4% )  | 5418 | 1150<br>( 21.2% ) |          |
| <i>Subvastus</i>                 |  | 1016<br>( 2.45% )  | 668 | 15<br>( 2.25% )  | 12831 | 420<br>( 3.27% )   | 22620 | 479<br>( 2.12% )   | 5418 | 102<br>( 1.88% )  |          |
| <i>Other</i>                     |  | 341<br>( .82% )    | 668 | 15<br>( 2.25% )  | 12831 | 117<br>( .912% )   | 22620 | 131<br>( .579% )   | 5418 | 78<br>( 1.44% )   |          |
| General anesthesia               |  | 13383<br>( 32.2% ) | 667 | 265<br>( 39.7% ) | 12819 | 4211<br>( 32.8% )  | 22617 | 7021<br>( 31.0% )  | 5418 | 1886<br>( 34.8% ) | p <.0001 |
| Steroids                         |  | 966<br>( 2.33% )   | 667 | 22<br>( 3.30% )  | 12819 | 268<br>( 2.09% )   | 22617 | 572<br>( 2.53% )   | 5418 | 104<br>( 1.92% )  | p <.0001 |
| Narcotic use prior to surgery    |  | 10588<br>( 25.5% ) | 667 | 187<br>( 28.0% ) | 12819 | 2963<br>( 23.1% )  | 22617 | 6222<br>( 27.5% )  | 5418 | 1216<br>( 22.4% ) | p <.0001 |
| ASA status                       |  |                    |     |                  |       |                    |       |                    |      |                   | p <.0001 |
| <i>I</i>                         |  | 702<br>( 1.69% )   | 667 | < 10             | 12806 | 250<br>( 1.95% )   | 22599 | 338<br>( 1.50% )   | 5416 | 107<br>( 1.98% )  |          |
| <i>II</i>                        |  | 21837<br>( 52.6% ) | 667 | 322<br>( 48.3% ) | 12806 | 6986<br>( 54.6% )  | 22599 | 11873<br>( 52.5% ) | 5416 | 2656<br>( 49.0% ) |          |
| <i>III</i>                       |  | 18480<br>( 44.5% ) | 667 | 323<br>( 48.4% ) | 12806 | 5438<br>( 42.5% )  | 22599 | 10130<br>( 44.8% ) | 5416 | 2589<br>( 47.8% ) |          |
| <i>IV</i>                        |  | 469<br>( 1.13% )   | 667 | 15<br>( 2.25% )  | 12806 | 132<br>( 1.03% )   | 22599 | 258<br>( 1.14% )   | 5416 | 64<br>( 1.18% )   |          |
| Insurance                        |  |                    |     |                  |       |                    |       |                    |      |                   | p <.0001 |
| <i>Commercial</i>                |  | 15128<br>( 36.4% ) | 668 | 233<br>( 34.9% ) | 12831 | 4868<br>( 37.9% )  | 22620 | 8335<br>( 36.8% )  | 5418 | 1692<br>( 31.2% ) |          |
| <i>Federal</i>                   |  | 19826<br>( 47.7% ) | 668 | 307<br>( 46.0% ) | 12831 | 5887<br>( 45.9% )  | 22620 | 10785<br>( 47.7% ) | 5418 | 2847<br>( 52.5% ) |          |
| <i>State, Local</i>              |  | 1278<br>( 3.08% )  | 668 | 21<br>( 3.14% )  | 12831 | 455<br>( 3.55% )   | 22620 | 691<br>( 3.05% )   | 5418 | 111<br>( 2.05% )  |          |
| <i>self/unknown/other</i>        |  | 5305<br>( 12.8% )  | 668 | 107<br>( 16.0% ) | 12831 | 1621<br>( 12.6% )  | 22620 | 2809<br>( 12.4% )  | 5418 | 768<br>( 14.2% )  |          |

|                                               |                    |     |                  |       |                    |       |                    |      |                   |          |
|-----------------------------------------------|--------------------|-----|------------------|-------|--------------------|-------|--------------------|------|-------------------|----------|
| On antiplatelet agent before admission        | 17393<br>( 41.9% ) | 667 | 280<br>( 42.0% ) | 12819 | 5485<br>( 42.8% )  | 22617 | 7837<br>( 34.7% )  | 5418 | 3791<br>( 70.0% ) | p <.0001 |
| History of bleeding disorder                  | 472<br>( 1.14% )   | 667 | 36<br>( 5.40% )  | 12799 | 136<br>( 1.06% )   | 22596 | 232<br>( 1.03% )   | 5414 | 68<br>( 1.26% )   | p <.0001 |
| History of VTE                                | 2320<br>( 5.59% )  | 667 | 39<br>( 5.85% )  | 12803 | 399<br>( 3.12% )   | 22589 | 1532<br>( 6.78% )  | 5409 | 350<br>( 6.47% )  | p <.0001 |
| Use of cane or walker prior to surgery        | 11911<br>( 30.1% ) | 617 | 196<br>( 31.8% ) | 12068 | 3373<br>( 27.9% )  | 21652 | 6683<br>( 30.9% )  | 5226 | 1659<br>( 31.7% ) | p <.0001 |
| Tranexamic acid given                         | 25698<br>( 61.9% ) | 668 | 381<br>( 57.0% ) | 12831 | 9135<br>( 71.2% )  | 22620 | 12678<br>( 56.0% ) | 5418 | 3504<br>( 64.7% ) | p <.0001 |
| Intermittent pneumatic calf compression       | 36113<br>( 86.9% ) | 668 | 607<br>( 90.9% ) | 12831 | 11755<br>( 91.6% ) | 22620 | 19670<br>( 87.0% ) | 5418 | 4081<br>( 75.3% ) | p <.0001 |
| Intermittent pneumatic foot pump              | 5789<br>( 13.9% )  | 668 | 93<br>( 13.9% )  | 12831 | 1195<br>( 9.31% )  | 22620 | 3577<br>( 15.8% )  | 5418 | 924<br>( 17.1% )  | p <.0001 |
| Comorbidity                                   |                    |     |                  |       |                    |       |                    |      |                   |          |
| <i>Compression stockings</i>                  | 21116<br>( 50.8% ) | 668 | 345<br>( 51.6% ) | 12831 | 6595<br>( 51.4% )  | 22620 | 10468<br>( 46.3% ) | 5418 | 3708<br>( 68.4% ) | p <.0001 |
| <i>Congestive heart failure</i>               | 907<br>( 2.25% )   | 604 | 21<br>( 3.48% )  | 12117 | 240<br>( 1.98% )   | 22405 | 460<br>( 2.05% )   | 5142 | 186<br>( 3.62% )  | p <.0001 |
| <i>Valvular disease</i>                       | 1256<br>( 3.12% )  | 604 | 26<br>( 4.30% )  | 12117 | 369<br>( 3.05% )   | 22405 | 655<br>( 2.92% )   | 5142 | 206<br>( 4.01% )  | p <.0001 |
| <i>Pulmonary circulation</i>                  | 310<br>( .770% )   | 604 | 14<br>( 2.32% )  | 12117 | 68<br>( .561% )    | 22405 | 175<br>( .781% )   | 5142 | 53<br>( 1.03% )   | p <.0001 |
| <i>Peripheral vascular disease</i>            | 877<br>( 2.18% )   | 604 | 15<br>( 2.48% )  | 12117 | 228<br>( 1.88% )   | 22405 | 485<br>( 2.16% )   | 5142 | 149<br>( 2.90% )  | p <.0001 |
| <i>Paralysis</i>                              | 82<br>( .204% )    | 604 | < 10             | 12117 | 18<br>( .149% )    | 22405 | 46<br>( .205% )    | 5142 | 15<br>( .292% )   | p <.0001 |
| <i>Other neurologic disorder</i>              | 1824<br>( 4.53% )  | 604 | 33<br>( 5.46% )  | 12117 | 529<br>( 4.37% )   | 22405 | 1034<br>( 4.62% )  | 5142 | 228<br>( 4.43% )  | p <.0001 |
| <i>Chronic lung disease</i>                   | 6695<br>( 16.6% )  | 604 | 108<br>( 17.9% ) | 12117 | 1887<br>( 15.6% )  | 22405 | 3861<br>( 17.2% )  | 5142 | 839<br>( 16.3% )  | p <.0001 |
| <i>Diabetes without chronic complications</i> | 7678<br>( 19.1% )  | 604 | 121<br>( 20.0% ) | 12117 | 2009<br>( 16.6% )  | 22405 | 4340<br>( 19.4% )  | 5142 | 1208<br>( 23.5% ) | p <.0001 |
| <i>Diabetes with chronic complications</i>    | 711<br>( 1.77% )   | 604 | 14<br>( 2.32% )  | 12117 | 206<br>( 1.70% )   | 22405 | 385<br>( 1.72% )   | 5142 | 106<br>( 2.06% )  | p <.0001 |
| <i>Hypothyroidism</i>                         | 7606<br>( 18.9% )  | 604 | 118<br>( 19.5% ) | 12117 | 2169<br>( 17.9% )  | 22405 | 4415<br>( 19.7% )  | 5142 | 904<br>( 17.6% )  | p <.0001 |
| <i>Renal failure</i>                          | 2086<br>( 5.18% )  | 604 | 47<br>( 7.78% )  | 12117 | 561<br>( 4.63% )   | 22405 | 1142<br>( 5.10% )  | 5142 | 336<br>( 6.53% )  | p <.0001 |
| <i>Liver disease</i>                          | 402<br>( .998% )   | 604 | 16<br>( 2.65% )  | 12117 | 125<br>( 1.03% )   | 22405 | 223<br>( .995% )   | 5142 | 38<br>( .739% )   | p <.0001 |
| <i>Peptic ulcer disease</i>                   | 11                 | 604 | < 10             | 12117 | < 10               | 22405 | < 10               | 5142 | < 10              | N/A      |

|                                                    |  |                  |     |                |       |                 |       |                  |      |                 |          |
|----------------------------------------------------|--|------------------|-----|----------------|-------|-----------------|-------|------------------|------|-----------------|----------|
|                                                    |  | (.027%)          |     |                |       |                 |       |                  |      |                 |          |
| <i>Acquired immune deficiency syndrome</i>         |  | < 10             | N/A | N/A            | N/A   | N/A             | 22405 | < 10             | 5142 | < 10            | N/A      |
| <i>Lymphoma</i>                                    |  | 112<br>(.278%)   | 604 | < 10           | 12117 | 30<br>(.248%)   | 22405 | 65<br>(.290%)    | 5142 | 16<br>(.311%)   | p <.0001 |
| <i>Metastatic cancer</i>                           |  | 19<br>(.047%)    | 604 | < 10           | 12117 | < 10            | 22405 | 10<br>(.045%)    | 5142 | < 10            | N/A      |
| <i>Solid tumor with or without metastasis</i>      |  | 140<br>(.348%)   | 604 | < 10           | 12117 | 45<br>(.371%)   | 22405 | 72<br>(.321%)    | 5142 | 20<br>(.389%)   | p <.0001 |
| <i>Arthritis</i>                                   |  | 1741<br>(4.32%)  | 604 | 32<br>(5.30%)  | 12117 | 526<br>(4.34%)  | 22405 | 946<br>(4.22%)   | 5142 | 237<br>(4.61%)  | p <.0001 |
| <i>Coagulopathy</i>                                |  | 778<br>(1.93%)   | 604 | 40<br>(6.62%)  | 12117 | 177<br>(1.46%)  | 22405 | 466<br>(2.08%)   | 5142 | 95<br>(1.85%)   | p <.0001 |
| <i>Obesity</i>                                     |  | 11207<br>(27.8%) | 604 | 178<br>(29.5%) | 12117 | 3179<br>(26.2%) | 22405 | 6349<br>(28.3%)  | 5142 | 1501<br>(29.2%) | p <.0001 |
| <i>Weight loss</i>                                 |  | 81<br>(.201%)    | 604 | < 10           | 12117 | 34<br>(.281%)   | 22405 | 34<br>(.152%)    | 5142 | 11<br>(.214%)   | p <.0001 |
| <i>Electrolyte imbalance</i>                       |  | 2596<br>(6.45%)  | 604 | 56<br>(9.27%)  | 12117 | 639<br>(5.27%)  | 22405 | 1584<br>(7.07%)  | 5142 | 317<br>(6.16%)  | p <.0001 |
| <i>Blood loss</i>                                  |  | 514<br>(1.28%)   | 604 | 11<br>(1.82%)  | 12117 | 115<br>(.949%)  | 22405 | 348<br>(1.55%)   | 5142 | 40<br>(.778%)   | p <.0001 |
| <i>Deficiency anemia</i>                           |  | 4412<br>(11.0%)  | 604 | 85<br>(14.1%)  | 12117 | 1049<br>(8.66%) | 22405 | 2798<br>(12.5%)  | 5142 | 480<br>(9.33%)  | p <.0001 |
| <i>Alcohol abuse</i>                               |  | 405<br>(1.01%)   | 604 | < 10           | 12117 | 134<br>(1.11%)  | 22405 | 221<br>(.986%)   | 5142 | 42<br>(.817%)   | p <.0001 |
| <i>Drug abuse</i>                                  |  | 319<br>(.792%)   | 604 | < 10           | 12117 | 74<br>(.611%)   | 22405 | 218<br>(.973%)   | 5142 | 20<br>(.389%)   | p <.0001 |
| <i>Psychiatric disorder</i>                        |  | 805<br>(2.00%)   | 604 | 18<br>(2.98%)  | 12117 | 212<br>(1.75%)  | 22405 | 496<br>(2.21%)   | 5142 | 79<br>(1.54%)   | p <.0001 |
| <i>Depression</i>                                  |  | 6385<br>(15.9%)  | 604 | 119<br>(19.7%) | 12117 | 1890<br>(15.6%) | 22405 | 3629<br>(16.2%)  | 5142 | 747<br>(14.5%)  | p <.0001 |
| <i>Hypertension (complicated or uncomplicated)</i> |  | 27134<br>(67.4%) | 604 | 409<br>(67.7%) | 12117 | 7813<br>(64.5%) | 22405 | 15151<br>(67.6%) | 5142 | 3761<br>(73.1%) | p <.0001 |

\*SD: standard deviation

\*Kruskal-Wallis Test: non-parametric testing of continuous variables for comparing independent groups

\*\* Pearson Chi-square tests: testing of association between two variables;

†Den: Denominator

‡Num: Numerator

Actual numbers for cell size <10 are not shown



**eTable 2. Adjusted Odds Ratio for the Primary Outcome VTE/Death and Secondary Outcome Bleeding Event:  
Excluding patients with VTE history**

Confounders considered in propensity score model include: age, age<sup>2</sup>, BMI, BMI<sup>2</sup>, preoperative hemoglobin, platelets and creatinine, sex, ASA, race, smoking status, insurance, marital status, preoperative narcotic, steroid, or antiplatelet use, bleeding disorder, use of assistive devices, Elixhauser variables, surgical approach, operative duration, pneumatic compression devices, foot pumps, tranexamic acid, anesthesia type.

| Comparisons                                 | VTE/Death*                               |                |                                                       |                                                                       |                                          | Bleeding Event*                          |                |                                                       |                                                                       |                                          |
|---------------------------------------------|------------------------------------------|----------------|-------------------------------------------------------|-----------------------------------------------------------------------|------------------------------------------|------------------------------------------|----------------|-------------------------------------------------------|-----------------------------------------------------------------------|------------------------------------------|
|                                             | OR (95% CI)                              | P value for OR | Absolute change in OR†: $\Delta_{OR} =  OR_2 - OR_1 $ | Relative change in OR‡: $100\% \times \Delta_{OR} / \min(OR_1, OR_2)$ | p for inferiority                        | OR (95% CI)                              | P value for OR | Absolute change in OR†: $\Delta_{OR} =  OR_2 - OR_1 $ | Relative change in OR‡: $100\% \times \Delta_{OR} / \min(OR_1, OR_2)$ | p for inferiority                        |
| None vs. anticoagulant only                 | 6.23 (4.46, 8.72)                        | <.0001         | 1.1                                                   | 21.44%                                                                |                                          | 1.21 (0.70, 2.07)                        | 0.50           | 0.01                                                  | 0.83%                                                                 |                                          |
| Aspirin only vs. anticoagulant only         | 1.02 (0.80, 1.30)                        | 0.89           | 0.17                                                  | 20.00%                                                                | 0.0177                                   | 0.81 (0.64, 1.02)                        | 0.08           | 0.01                                                  | 1.25%                                                                 | 0.0085                                   |
| Both vs. anticoagulant only                 | 1.11 (0.84, 1.47)                        | 0.45           | 0.1                                                   | 9.90%                                                                 |                                          | 0.94 (0.71, 1.25)                        | 0.68           | 0.04                                                  | 4.26%                                                                 |                                          |
| <b>Sensitivity of excluding VTE history</b> | <b>Significance conclusion unchanged</b> |                |                                                       | <b>Greatest possible relative change &lt; 21.5%</b>                   | <b>Significance conclusion unchanged</b> | <b>Significance conclusion unchanged</b> |                |                                                       | <b>Greatest possible relative change &lt; 5%</b>                      | <b>Significance conclusion unchanged</b> |

Note

\* Historical VTE cases excluded (n = 2320 which is 5.6% of the total)

† Absolute change in OR point estimates is calculated by the absolute changes in odds ratio (OR), i.e.,  $\Delta_{OR} = |OR_2 - OR_1|$ , where OR<sub>1</sub> is the OR obtained using the complete dataset including VTE history cases, while OR<sub>2</sub> is the OR excluding VTE history cases.

‡ Relative changes in OR point estimates is the relative difference in OR including VTE history vs excluding VTE history, calculated by  $\Delta_{OR} / \min(OR_1, OR_2) \times 100\%$ , where OR<sub>1</sub> is the OR obtained using the complete dataset including VTE history cases, while OR<sub>2</sub> is the OR excluding VTE history cases. The minimum value of  $\min(OR_1, OR_2)$  allows to capture the biggest relative differences.
